# Supplementary material for: Characterization of the expression and prognostic value of 14-3-3 isoforms in breast cancer
Source: Aging (Albany NY). 2020 Oct 14;12(19):19597–617. doi: 10.18632/aging.103919 (PMC7732302; doi:10.18632/aging.103919)
Supplement: Supplementary Table 1 [file aging-12-103919-s001..xlsx]

## Sheet: Total nodes in Figure8
Supplementary Table 1. Crucial nodes in the 14-3-3-invovled PPI network.
Id	Label	Degree	Betweenness
7534	14-3-3 zeta	439	209692
7532	14-3-3 gamma	234	102384
7531	14-3-3 epsilon	231	76858.6
10971	14-3-3 theta	219	72356.6
2810	14-3-3 sigma	167	75330.6
7529	14-3-3 beta	164	51256
7533	14-3-3 eta	137	38629
4217	MAP3K5	7	482.78
9156	EXO1	7	482.78
572	BAD	7	482.78
3799	KIF5B	7	482.78
995	CDC25C	7	482.78
51564	HDAC7	7	482.78
9759	HDAC4	7	482.78
4140	MARK3	7	482.78
64837	KLC2	7	482.78
4008	LMO7	6	482.78
23387	SIK3	6	482.78
8711	TNK1	6	428.48
23313	KIAA0930	6	428.48
4139	MARK1	6	425.64
23327	NEDD4L	6	365.98
9770	RASSF2	6	196.66
2885	GRB2	6	196.66
10749	KIF1C	6	196.66
9531	BAG3	6	196.66
5208	PFKFB2	6	196.66
2811	GP1BA	6	196.66
2335	FN1	6	196.66
9846	GAB2	6	171.1
1956	EGFR	5	428.48
23677	SH3BP4	5	428.48
23524	SRRM2	5	371.34
51474	LIMA1	5	196.66
5590	PRKCZ	5	196.66
984	CDK11B	5	196.66
7846	TUBA1A	5	196.66
65125	WNK1	5	196.66
7159	TP53BP2	5	196.66
5129	CDK18	5	196.66
7128	TNFAIP3	5	196.66
10014	HDAC5	5	171.1
51307	FAM53C	5	171.1
10458	BAIAP2	5	139.52
409	ARRB2	5	57.14
5127	CDK16	5	0
25	ABL1	4	311.68
5318	PKP2	4	311.68
4194	MDM4	4	308.85
51599	LSR	4	231.81
3303	HSPA1A	4	196.66
65220	NADK	4	196.66
993	CDC25A	4	196.66
55177	FAM82A2	4	196.66
3014	H2AFX	4	196.66
3304	HSPA1B	4	196.66
10413	YAP1	4	196.66
2309	FOXO3	4	196.66
1503	CTPS	4	196.66
1676	DFFA	4	196.66
7278	TUBA3C	4	196.66
113457	TUBA3D	4	196.66
9882	TBC1D4	4	196.66
994	CDC25B	4	171.1
26031	OSBPL3	4	171.1
3621	ING1	4	171.1
51514	DTL	4	171.1
867	CBL	4	171.1
9101	USP8	4	171.1
10238	DCAF7	4	171.1
6927	HNF1A	4	139.52
22983	MAST1	4	139.52
9470	EIF4E2	4	139.52
54206	ERRFI1	4	116.8
7157	TP53	4	116.8
84978	FRMD5	4	57.14
56288	PARD3	4	54.3
27237	ARHGEF16	4	0
22841	RAB11FIP2	4	0
85389	SNORD14C	4	0
85390	SNORD14D	4	0
9135	RABEP1	4	0
3312	HSPA8	4	0
4843	NOS2	4	0
83987	CCDC8	4	0
89953	KLC4	4	0
120892	LRRK2	4	0
23332	CLASP1	4	0
26270	FBXO6	4	0
23367	LARP1	4	0
4738	NEDD8	4	0
11190	CEP250	4	0
23095	KIF1B	4	0
64092	SAMSN1	3	254.54
390	RND3	3	254.54
57530	CGN	3	254.54
51776	ZAK	3	254.54
7465	WEE1	3	254.54
3667	IRS1	3	231.81
7352	UCP3	3	196.66
7351	UCP2	3	196.66
2869	GRK5	3	196.66
1130	LYST	3	196.66
5998	RGS3	3	196.66
9859	CEP170	3	196.66
54434	SSH1	3	196.66
3315	HSPB1	3	196.66
51248	PDZD11	3	171.1
9564	BCAR1	3	171.1
4301	MLLT4	3	139.52
9610	RIN1	3	139.52
10284	SAP18	3	139.52
10921	RNPS1	3	139.52
5604	MAP2K1	3	139.52
7412	VCAM1	3	139.52
3676	ITGA4	3	139.52
80851	SH3BP5L	3	139.52
26999	CYFIP2	3	139.52
5784	PTPN14	3	139.52
60485	SAV1	3	116.8
29127	RACGAP1	3	115.02
84254	CAMKK1	3	57.14
5128	CDK17	3	57.14
4609	MYC	3	57.14
7538	ZFP36	3	57.14
10746	MAP3K2	3	54.3
2011	MARK2	3	54.3
10298	PAK4	3	54.3
673	BRAF	3	54.3
3831	KLC1	3	54.3
7249	TSC2	3	54.3
9493	KIF23	3	54.3
22954	TRIM32	3	54.3
5894	RAF1	3	54.3
2099	ESR1	3	0
678	ZFP36L2	3	0
7074	TIAM1	3	0
23216	TBC1D1	3	0
5584	PRKCI	3	0
3097	HIVEP2	3	0
9221	NOLC1	3	0
25937	WWTR1	3	0
84206	MEX3B	3	0
6624	FSCN1	3	0
11228	RASSF8	3	0
23136	EPB41L3	3	0
7248	TSC1	3	0
8452	CUL3	3	0
6175	RPLP0	3	0
6188	RPS3	3	0
23122	CLASP2	3	0
5218	CDK14	3	0
708	C1QBP	3	0
57787	MARK4	3	0
10075	HUWE1	3	0
7431	VIM	3	0
3875	KRT18	3	0
27185	DISC1	3	0
1017	CDK2	3	0
2597	GAPDH	3	0
801	CALM1	3	0
805	CALM2	3	0
7054	TH	3	0
808	CALM3	3	0
10856	RUVBL2	3	0
80025	PANK2	3	0
2308	FOXO1	3	0
23235	SIK2	3	0
4214	MAP3K1	3	0
28954	REM1	3	0
324	APC	3	0
7408	VASP	3	0
51306	FAM13B	3	0
3689	ITGB2	2	139.52
1665	DHX15	2	139.52
677	ZFP36L1	2	139.52
3480	IGF1R	2	139.52
54541	DDIT4	2	139.52
5603	MAPK13	2	139.52
6709	SPTAN1	2	139.52
7316	UBC	2	139.52
9721	GPRIN2	2	116.8
9734	HDAC9	2	116.8
23710	GABARAPL1	2	116.8
57619	SHROOM3	2	115.02
3983	ABLIM1	2	115.02
80346	REEP4	2	115.02
253260	RICTOR	2	115.02
144100	PLEKHA7	2	57.14
6428	SRSF3	2	57.14
90102	PHLDB2	2	57.14
4215	MAP3K3	2	57.14
7375	USP4	2	54.3
4486	MST1R	2	54.3
2908	NR3C1	2	54.3
5298	PI4KB	2	0
8660	IRS2	2	0
57584	ARHGAP21	2	0
207	AKT1	2	0
1386	ATF2	2	0
27332	ZNF638	2	0
1111	CHEK1	2	0
55103	RALGPS2	2	0
1859	DYRK1A	2	0
54165	DCUN1D1	2	0
3064	HTT	2	0
57622	LRFN1	2	0
122786	FRMD6	2	0
6202	RPS8	2	0
8673	VAMP8	2	0
5071	PARK2	2	0
595097	SNORD16	2	0
23031	MAST3	2	0
81565	NDEL1	2	0
94163	SNORD38B	2	0
23108	RAP1GAP2	2	0
26811	SNORD55	2	0
6124	RPL4	2	0
506	ATP5B	2	0
498	ATP5A1	2	0
595100	SNORD18C	2	0
595098	SNORD18A	2	0
595099	SNORD18B	2	0
150094	SIK1	2	0
4628	MYH10	2	0
988	CDC5L	2	0
84952	CGNL1	2	0
6310	ATXN1	2	0
23139	MAST2	2	0
6744	SSFA2	2	0
10036	CHAF1A	2	0
1994	ELAVL1	2	0
26986	PABPC1	2	0
256364	EML3	2	0
117583	PARD3B	2	0
79109	MAPKAP1	2	0
5618	PRLR	2	0
375484	C5orf25	2	0
80153	EDC3	2	0
9181	ARHGEF2	2	0
10198	MPHOSPH9	2	0
25913	POT1	2	0
5578	PRKCA	2	0
27342	RABGEF1	2	0
6732	SRPK1	2	0
9729	KIAA0408	2	0
10260	DENND4A	2	0
10987	COPS5	2	0
26524	LATS2	2	0
85440	DOCK7	2	0
367	AR	2	0
50855	PARD6A	2	0
5170	PDPK1	2	0
10133	OPTN	2	0
3158	HMGCS2	2	0
4869	NPM1	2	0
302	ANXA2	2	0
6129	RPL7	2	0
1778	DYNC1H1	2	0
5295	PIK3R1	2	0
8358	HIST1H3B	2	0
4776	NFATC4	2	0
8357	HIST1H3H	2	0
90655	TGIF2LY	2	0
23286	WWC1	2	0
65266	WNK4	2	0
7163	TPD52	2	0
4000	LMNA	2	0
8968	HIST1H3F	2	0
7094	TLN1	2	0
55835	CENPJ	2	0
88	ACTN2	2	0
51138	COPS4	2	0
171024	SYNPO2	2	0
11345	GABARAPL2	2	0
85366	MYLK2	2	0
8352	HIST1H3C	2	0
59	ACTA2	2	0
4736	RPL10A	2	0
8356	HIST1H3J	2	0
8353	HIST1H3E	2	0
5315	PKM2	2	0
301	ANXA1	2	0
7167	TPI1	2	0
8350	HIST1H3A	2	0
7168	TPM1	2	0
7015	TERT	2	0
84962	AJUBA	2	0
8351	HIST1H3D	2	0
71	ACTG1	2	0
53354	PANK1	2	0
8355	HIST1H3G	2	0
5562	PRKAA1	2	0
5058	PAK1	2	0
8354	HIST1H3I	2	0
7283	TUBG1	2	0
6143	RPL19	2	0
23363	OBSL1	2	0
8826	IQGAP1	2	0
4629	MYH11	2	0
5588	PRKCQ	2	0
3856	KRT8	2	0
7280	TUBB2A	2	0
3939	LDHA	2	0
8566	PDXK	2	0
1674	DES	2	0
117178	SSX2IP	2	0
56907	SPIRE1	2	0
3006	HIST1H1C	2	0
1915	EEF1A1	2	0
7709	ZBTB17	2	0
8735	MYH13	2	0
4627	MYH9	2	0
60	ACTB	2	0
357	SHROOM2	2	0
369	ARAF	2	0
779	CACNA1S	2	0
836	CASP3	2	0
1213	CLTC	2	0
2194	FASN	2	0
3005	H1F0	2	0
3800	KIF5C	2	0
3872	KRT17	2	0
4033	LRMP	2	0
4291	MLF1	2	0
4686	NCBP1	2	0
4772	NFATC1	2	0
5216	PFN1	2	0
5774	PTPN3	2	0
6181	RPLP2	2	0
6446	SGK1	2	0
6697	SPR	2	0
6854	SYN2	2	0
7415	VCP	2	0
8496	PPFIBP1	2	0
9706	ULK2	2	0
9778	KIAA0232	2	0
11001	SLC27A2	2	0
22909	FAN1	2	0
23034	SAMD4A	2	0
23077	MYCBP2	2	0
23164	MPRIP	2	0
23241	PACS2	2	0
23294	ANKS1A	2	0
23373	CRTC1	2	0
23451	SF3B1	2	0
54882	ANKHD1	2	0
65055	REEP1	2	0
79801	SHCBP1	2	0
84552	PARD6G	2	0
253650	ANKRD18A	2	0
404734	ANKHD1-EIF4EBP3	2	0
619565	SNORA52	2	0
8470	SORBS2	1	0
9414	TJP2	1	0
85415	RHPN2	1	0
23479	ISCU	1	0
1398	CRK	1	0
3184	HNRNPD	1	0
7681	MKRN3	1	0
4100	MAGEA1	1	0
9679	FAM53B	1	0
10045	SH2D3A	1	0
117177	RAB3IP	1	0
4303	FOXO4	1	0
10772	SRSF10	1	0
9223	MAGI1	1	0
55765	C1orf106	1	0
10980	COPS6	1	0
8626	TP63	1	0
171483	FAM9B	1	0
5771	PTPN2	1	0
387597	ILDR2	1	0
23328	SASH1	1	0
100616150	MIR4720	1	0
290	ANPEP	1	0
26037	SIPA1L1	1	0
10607	TBL3	1	0
8480	RAE1	1	0
581	BAX	1	0
5576	PRKAR2A	1	0
91694	LONRF1	1	0
113878	DTX2	1	0
8495	PPFIBP2	1	0
55561	CDC42BPG	1	0
8871	SYNJ2	1	0
8796	SCEL	1	0
7706	TRIM25	1	0
9266	CYTH2	1	0
11187	PKP3	1	0
79839	CCDC102B	1	0
22884	WDR37	1	0
11186	RASSF1	1	0
6764	ST5	1	0
134549	SHROOM1	1	0
124739	USP43	1	0
23426	GRIP1	1	0
23518	R3HDM1	1	0
284403	WDR62	1	0
283638	KIAA0284	1	0
26115	TANC2	1	0
10018	BCL2L11	1	0
23074	UHRF1BP1L	1	0
3280	HES1	1	0
57706	DENND1A	1	0
92799	SHKBP1	1	0
3688	ITGB1	1	0
9462	RASAL2	1	0
6788	STK3	1	0
9710	KIAA0355	1	0
1540	CYLD	1	0
55893	ZNF395	1	0
11214	AKAP13	1	0
6242	RTKN	1	0
2039	EPB49	1	0
6733	SRPK2	1	0
9644	SH3PXD2A	1	0
11135	CDC42EP1	1	0
4513	COX2	1	0
9874	TLK1	1	0
8535	CBX4	1	0
112714	TUBA3E	1	0
139324	HDX	1	0
4294	MAP3K10	1	0
3757	KCNH2	1	0
8266	UBL4A	1	0
2495	FTH1	1	0
50852	TRAT1	1	0
80217	WDR96	1	0
2735	GLI1	1	0
5955	RCN2	1	0
5636	PRPSAP2	1	0
23118	TAB2	1	0
10526	IPO8	1	0
2	A2M	1	0
5893	RAD52	1	0
79930	DOK3	1	0
3122	HLA-DRA	1	0
3301	DNAJA1	1	0
5406	PNLIP	1	0
65057	ACD	1	0
144097	C11orf84	1	0
5920	RARRES3	1	0
11035	RIPK3	1	0
9967	THRAP3	1	0
4236	MFAP1	1	0
4116	MAGOH	1	0
2037	EPB41L2	1	0
100302242	MIR1236	1	0
10397	NDRG1	1	0
124245	ZC3H18	1	0
8766	RAB11A	1	0
10524	KAT5	1	0
57698	KIAA1598	1	0
213	ALB	1	0
64784	CRTC3	1	0
10129	FRY	1	0
51111	SUV420H1	1	0
203068	TUBB	1	0
8687	KRT38	1	0
1198	CLK3	1	0
11346	SYNPO	1	0
6426	SRSF1	1	0
10787	NCKAP1	1	0
533	ATP6V0B	1	0
85377	MICALL1	1	0
51517	NCKIPSD	1	0
8729	GBF1	1	0
2931	GSK3A	1	0
219771	CCNY	1	0
9064	MAP3K6	1	0
5591	PRKDC	1	0
351	APP	1	0
7919	DDX39B	1	0
49854	ZNF295	1	0
6789	STK4	1	0
7936	RDBP	1	0
51747	LUC7L3	1	0
51530	ZC3HC1	1	0
27339	PRPF19	1	0
29896	TRA2A	1	0
692199	SNORD84	1	0
29105	C16orf80	1	0
7013	TERF1	1	0
30849	PIK3R4	1	0
26064	RAI14	1	0
5579	PRKCB	1	0
1434	CSE1L	1	0
4035	LRP1	1	0
399664	MEX3D	1	0
1137	CHRNA4	1	0
8844	KSR1	1	0
6468	FBXW4	1	0
84612	PARD6B	1	0
5745	PTH1R	1	0
91833	WDR20	1	0
9321	TRIP11	1	0
1762	DMWD	1	0
1454	CSNK1E	1	0
293	SLC25A6	1	0
84335	AKT1S1	1	0
6189	RPS3A	1	0
3921	RPSA	1	0
8370	HIST2H4A	1	0
65268	WNK2	1	0
8366	HIST1H4B	1	0
6164	RPL34	1	0
7158	TP53BP1	1	0
26778	SNORA70	1	0
1933	EEF1B2	1	0
6157	RPL27A	1	0
6207	RPS13	1	0
9584	RBM39	1	0
6044	SNORA62	1	0
6205	RPS11	1	0
8367	HIST1H4E	1	0
8944	SNORD73A	1	0
619570	SNORD95	1	0
9240	PNMA1	1	0
226	ALDOA	1	0
92609	TIMM50	1	0
4621	MYH3	1	0
7001	PRDX2	1	0
79026	AHNAK	1	0
8360	HIST1H4D	1	0
4233	MET	1	0
8904	CPNE1	1	0
6277	S100A6	1	0
8362	HIST1H4K	1	0
10627	MYL12A	1	0
10146	G3BP1	1	0
142	PARP1	1	0
10066	SCAMP2	1	0
548596	CKMT1A	1	0
6194	RPS6	1	0
2932	GSK3B	1	0
56257	MEPCE	1	0
652965	SNORA48	1	0
3185	HNRNPF	1	0
8364	HIST1H4C	1	0
11224	RPL35	1	0
606500	SNORD68	1	0
5093	PCBP1	1	0
15	AANAT	1	0
81027	TUBB1	1	0
26509	MYOF	1	0
1439	CSF2RB	1	0
121504	HIST4H4	1	0
3880	KRT19	1	0
574040	SNORA6	1	0
8363	HIST1H4J	1	0
6125	RPL5	1	0
53616	ADAM22	1	0
3632	INPP5A	1	0
6464	SHC1	1	0
8661	EIF3A	1	0
619569	SNORA41	1	0
8664	EIF3D	1	0
100508408	LOC100508408	1	0
6134	RPL10	1	0
1832	DSP	1	0
7414	VCL	1	0
26289	AK5	1	0
23450	SF3B3	1	0
10376	TUBA1B	1	0
1973	EIF4A1	1	0
89	ACTN3	1	0
619562	SNORA3	1	0
3178	HNRNPA1	1	0
3581	IL9R	1	0
79872	CBLL1	1	0
6201	RPS7	1	0
4343	MOV10	1	0
2316	FLNA	1	0
57562	KIAA1377	1	0
3320	HSP90AA1	1	0
5136	PDE1A	1	0
8359	HIST1H4A	1	0
3491	CYR61	1	0
9589	WTAP	1	0
147700	KLC3	1	0
8993	PGLYRP1	1	0
55197	RPRD1A	1	0
29109	FHOD1	1	0
554313	HIST2H4B	1	0
6083	SNORD21	1	0
652966	SNORD10	1	0
619571	SNORD96A	1	0
3945	LDHB	1	0
7145	TNS1	1	0
6223	RPS19	1	0
4904	YBX1	1	0
5984	RFC4	1	0
23344	ESYT1	1	0
23137	SMC5	1	0
2475	MTOR	1	0
6421	SFPQ	1	0
6137	RPL13	1	0
7913	DEK	1	0
8361	HIST1H4F	1	0
5479	PPIB	1	0
3305	HSPA1L	1	0
8368	HIST1H4L	1	0
8365	HIST1H4H	1	0
6657	SOX2	1	0
8294	HIST1H4I	1	0
85388	SNORD14B	1	0
8567	MADD	1	0
26781	SNORA67	1	0
25923	ATL3	1	0
1159	CKMT1B	1	0
440689	HIST2H2BF	1	0
10399	GNB2L1	1	0
6210	RPS15A	1	0
10197	PSME3	1	0
4093	SMAD9	1	0
60491	NIF3L1	1	0
84937	ZNRF1	1	0
5105	PCK1	1	0
4790	NFKB1	1	0
4634	MYL3	1	0
1947	EFNB1	1	0
140	ADORA3	1	0
1026	CDKN1A	1	0
8204	NRIP1	1	0
1869	E2F1	1	0
4625	MYH7	1	0
6710	SPTB	1	0
79084	WDR77	1	0
56893	UBQLN4	1	0
7942	TFEB	1	0
6452	SH3BP2	1	0
5139	PDE3A	1	0
54820	NDE1	1	0
10163	WASF2	1	0
56947	MFF	1	0
79658	ARHGAP10	1	0
1612	DAPK1	1	0
26994	RNF11	1	0
16	AARS	1	0
81	ACTN4	1	0
125	ADH1B	1	0
189	AGXT	1	0
271	AMPD2	1	0
322	APBB1	1	0
334	APLP2	1	0
445	ASS1	1	0
490	ATP2B1	1	0
491	ATP2B2	1	0
492	ATP2B3	1	0
672	BRCA1	1	0
811	CALR	1	0
815	CAMK2A	1	0
902	CCNH	1	0
983	CDK1	1	0
1027	CDKN1B	1	0
1072	CFL1	1	0
1207	CLNS1A	1	0
1452	CSNK1A1	1	0
1457	CSNK2A1	1	0
1491	CTH	1	0
1654	DDX3X	1	0
1917	EEF1A2	1	0
1938	EEF2	1	0
1949	EFNB3	1	0
1975	EIF4B	1	0
2064	ERBB2	1	0
2192	FBLN1	1	0
2263	FGFR2	1	0
2492	FSHR	1	0
2643	GCH1	1	0
2664	GDI1	1	0
2669	GEM	1	0
2737	GLI3	1	0
2886	GRB7	1	0
2938	GSTA1	1	0
3123	HLA-DRB1	1	0
3127	HLA-DRB5	1	0
3187	HNRNPH1	1	0
3192	HNRNPU	1	0
3196	TLX2	1	0
3308	HSPA4	1	0
3313	HSPA9	1	0
3615	IMPDH2	1	0
3643	INSR	1	0
3777	KCNK3	1	0
3857	KRT9	1	0
3881	KRT31	1	0
3885	KRT34	1	0
3891	KRT85	1	0
3898	LAD1	1	0
3937	LCP2	1	0
3956	LGALS1	1	0
3984	LIMK1	1	0
4113	MAGEB2	1	0
4131	MAP1B	1	0
4193	MDM2	1	0
4286	MITF	1	0
4750	NEK1	1	0
4841	NONO	1	0
5052	PRDX1	1	0
5214	PFKP	1	0
5223	PGAM1	1	0
5287	PIK3C2B	1	0
5289	PIK3C3	1	0
5291	PIK3CB	1	0
5348	FXYD1	1	0
5411	PNN	1	0
5495	PPM1B	1	0
5521	PPP2R2B	1	0
5528	PPP2R5D	1	0
5582	PRKCG	1	0
5598	MAPK7	1	0
5605	MAP2K2	1	0
5631	PRPS1	1	0
5707	PSMD1	1	0
5708	PSMD2	1	0
5725	PTBP1	1	0
5800	PTPRO	1	0
5909	RAP1GAP	1	0
5923	RASGRF1	1	0
6122	RPL3	1	0
6128	RPL6	1	0
6130	RPL7A	1	0
6132	RPL8	1	0
6138	RPL15	1	0
6139	RPL17	1	0
6141	RPL18	1	0
6147	RPL23A	1	0
6152	RPL24	1	0
6154	RPL26	1	0
6160	RPL31	1	0
6169	RPL38	1	0
6187	RPS2	1	0
6195	RPS6KA1	1	0
6203	RPS9	1	0
6217	RPS16	1	0
6222	RPS18	1	0
6224	RPS20	1	0
6227	RPS21	1	0
6230	RPS25	1	0
6236	RRAD	1	0
6472	SHMT2	1	0
6602	SMARCD1	1	0
6622	SNCA	1	0
6635	SNRPE	1	0
6638	SNRPN	1	0
6651	SON	1	0
6737	TRIM21	1	0
6908	TBP	1	0
7037	TFRC	1	0
7067	THRA	1	0
7164	TPD52L1	1	0
7203	CCT3	1	0
7430	EZR	1	0
7984	ARHGEF5	1	0
8027	STAM	1	0
8030	CCDC6	1	0
8329	HIST1H2AI	1	0
8330	HIST1H2AK	1	0
8332	HIST1H2AL	1	0
8336	HIST1H2AM	1	0
8453	CUL2	1	0
8454	CUL1	1	0
8462	KLF11	1	0
8665	EIF3F	1	0
8666	EIF3G	1	0
8745	ADAM23	1	0
8926	SNURF	1	0
8969	HIST1H2AG	1	0
9021	SOCS3	1	0
9360	PPIG	1	0
9413	FAM189A2	1	0
9497	SLC4A7	1	0
9611	NCOR1	1	0
9627	SNCAIP	1	0
9636	ISG15	1	0
9669	EIF5B	1	0
9699	RIMS2	1	0
9711	KIAA0226	1	0
9743	ARHGAP32	1	0
9750	FAM65B	1	0
9774	BCLAF1	1	0
9824	ARHGAP11A	1	0
9828	ARHGEF17	1	0
9908	G3BP2	1	0
9961	MVP	1	0
10016	PDCD6	1	0
10102	TSFM	1	0
10134	BCAP31	1	0
10314	LANCL1	1	0
10383	TUBB4B	1	0
10486	CAP2	1	0
10687	PNMA2	1	0
10733	PLK4	1	0
10808	HSPH1	1	0
10927	SPIN1	1	0
11047	ADRM1	1	0
11140	CDC37	1	0
22827	PUF60	1	0
22876	INPP5F	1	0
22895	RPH3A	1	0
22985	ACIN1	1	0
22999	RIMS1	1	0
23085	ERC1	1	0
23094	SIPA1L3	1	0
23204	ARL6IP1	1	0
23271	CAMSAP2	1	0
23291	FBXW11	1	0
23331	TTC28	1	0
23395	LARS2	1	0
23435	TARDBP	1	0
23517	SKIV2L2	1	0
23557	SNAPIN	1	0
23588	KLHDC2	1	0
25776	CBY1	1	0
25873	RPL36	1	0
25898	RCHY1	1	0
26135	SERBP1	1	0
26276	VPS33B	1	0
26585	GREM1	1	0
26784	SNORA64	1	0
26790	SNORD58B	1	0
26791	SNORD58A	1	0
26795	SNORD54	1	0
26809	SNORD42A	1	0
26814	SNORD36B	1	0
26815	SNORD36A	1	0
26820	SNORD24	1	0
27018	NGFRAP1	1	0
28966	SNX24	1	0
29922	NME7	1	0
51305	KCNK9	1	0
51319	RSRC1	1	0
51320	MEX3C	1	0
51377	UCHL5	1	0
51631	LUC7L2	1	0
51741	WWOX	1	0
53635	PTOV1	1	0
54471	SMCR7L	1	0
54477	PLEKHA5	1	0
55093	WDYHV1	1	0
55095	SAMD4B	1	0
55110	MAGOHB	1	0
55167	MSL2	1	0
55660	PRPF40A	1	0
55661	DDX27	1	0
55667	DENND4C	1	0
55704	CCDC88A	1	0
56254	RNF20	1	0
56924	PAK6	1	0
57216	VANGL2	1	0
57460	PPM1H	1	0
57521	RPTOR	1	0
57522	SRGAP1	1	0
57578	UNC79	1	0
58517	RBM25	1	0
64854	USP46	1	0
79666	PLEKHF2	1	0
79696	ZC2HC1C	1	0
81579	PLA2G12A	1	0
83737	ITCH	1	0
84451	KIAA1804	1	0
84669	USP32	1	0
84951	TNS4	1	0
85235	HIST1H2AH	1	0
85379	KIAA1671	1	0
90956	ADCK2	1	0
92840	REEP6	1	0
94274	PPP1R14A	1	0
103910	MYL12B	1	0
112869	CCDC101	1	0
114798	SLITRK1	1	0
116936	RNU86	1	0
116938	SNORD83B	1	0
116988	AGAP3	1	0
122622	ADSSL1	1	0
126393	HSPB6	1	0
139818	DOCK11	1	0
150864	FAM117B	1	0
154796	AMOT	1	0
159195	USP54	1	0
171568	POLR3H	1	0
221035	REEP3	1	0
283106	CSNK2A1P	1	0
285527	FRYL	1	0
287015	TRIM42	1	0
347733	TUBB2B	1	0
445571	CBWD3	1	0
644815	FAM83G	1	0
100124516	SNORD58C	1	0
100506882	LOC100506882	1	0
100507709	LOC100507709	1	0
100507714	LOC100507714	1	0
100616459	MIR4745	1	0
100653049	LOC100653049	1	0
100653334	LOC100653334	1	0
